# Supplementary material for: Autonomous action and cooperativity between the ONECUT2 transcription factor and its 3′ untranslated region
Source: Front Cell Dev Biol. 2023 Jul 5;11:1206259. doi: 10.3389/fcell.2023.1206259 (PMC10356556; doi:10.3389/fcell.2023.1206259)
Supplement: Supplementary file 2 [file Table1.XLSX]

## Sheet: Table 1A
	Species	ONECUT2 3'UTR Length (bp)
	Human	14575
	Chimpanzee	14598
	Rhesus	14579
	Dog	14642
	Cow	14367
	Opossum	13420
	Chicken	5462
	Rat	14227
	Mouse	14063
	Frog	3404

## Sheet: Table 1C
	Gene SymboI	3' UTR Length
	SH3TC2	22561
	AAK1	17874
	LPP	16193
	QKI	14851
	ONECUT2	14575
	KSR2	14187
	ZNF704	12915
	TNRC6B	12567
	NSL1	12544

## Sheet: Table 1E
	Gene Symbol	Number of miRNA binding sites
	ZBTB20	923
	AAK1	425
	QKI	420
	LPP	368
	ONECUT2	345
	AGO3	340
	NFIB	325
	TNRC6B	317
	ZNF704	309
	DGKH	299

## Sheet: Table 2G
	miRNA	OC2 correlated tarqet count	Enrichment P-value	OC2 binding site count
	hsa-miR-124	71	5.05e-05	4
	hsa-miR-101	56	6.93e-07	6
	hsa-miR-340	56	1.25e-05	10
	hsa-miR-182	54	6.6e-06	9
	hsa-miR-9	52	8.84e-05	23

## Sheet: Table 8A
	Gene	22Rv1 OC2 UTR Log Adjusted Fold Change	P-value	22Rv1 OC2 DNA Adjusted Log Fold Change	P-Value	22Rv1 miR-9 Log Adjusted Fold Change	P-value
	AKR1C1	4.1	1.87e-15	5.1	4.31e-16	-1	2.33e-06
	AKR1C3	3.2	1.23e-09	2.7	7.82608	-3.8	5.68e-11
	AKR1C4	3	6.46e-12	3.6	3.23e-12	-2.1	1.16e-09
	AKR1C8P	4.7	5.15616	5.9	1.65e-16	-6	0.001224
	UGT1A6	-2.7	8.46e-13	-3.4	1.27e-13	-6	7.69e-19
	UGT1A8	-2.2	1.16e-08	-2.9	1.46e-09	-5.5	4.54e-15
	UGT2B10	1.8	1.18e-08	2.9	6.16e-11	-2	2.73e-09
	UGT2B11	2	1.09e-07	2.5	1.66e-08	-2.8	3.5e-10
	UGT2B15	4.6	1.42e-13	5.8	3.38e-14	-1	0.000508
	UGT2B4	-3.7	6.6e-14	-3.1	8.13e-12	-5.8	3.96e-17
	UGT2B7	3.3	1.35e-08	3.8	9.74e-09	-1.2	0.003369
